# Supplementary material for: Three coordinate models for the binuclear CuA electron-transfer site
Source: Royal Society of Chemistry journal article supplement (doi:10.1039/c3sc21936d), 2013-01-01
Supplement: c3sc21936d.pdf [file c3sc21936d.pdf]

Electronic Supporting Information for:

**Three coordinate models for the binuclear Cu<sub>A</sub> electron-transfer site**

Shiyu Zhang and Timothy H. Warren\*

Department of Chemistry, Georgetown University, Box 571227, Washington, DC  
20057, United States

**Contents**

**General Experimental Details**

**Preparation of Compounds (Figures S1-S8; Table S1)**

**Computational Details (Figures S9-S16; Tables S2-S5)**

**EPR Spectra (Figures S17-S18)**

**Crystallographic Details and ORTEP Representations (Figures S19-S21)**

## General Experimental Details

All experiments were carried out in a dry nitrogen atmosphere using an MBraun glovebox and/or standard Schlenk techniques. 4 Å molecular sieves were activated *in vacuo* at 180 °C for 24 h. Dry toluene, fluorobenzene and dichloromethane were purchased from Aldrich and were stored over activated 4 Å molecular sieves under nitrogen. Tetrahydrofuran (THF) was first sparged with nitrogen and then dried by passage through activated alumina columns. Pentane was first washed with conc. HNO<sub>3</sub>/H<sub>2</sub>SO<sub>4</sub> to remove olefins, stored over CaCl<sub>2</sub> and passed through activated alumina column. All deuterated solvents were sparged with nitrogen, dried over activated 4 Å molecular sieves and stored under nitrogen. <sup>1</sup>H and <sup>13</sup>C NMR spectra were recorded on Varian 400 MHz spectrometer. All NMR spectra were recorded at room temperature unless otherwise noted and were indirectly referenced to TMS using residual solvent signals as internal standards. Elemental analyses were performed on a Perkin-Elmer PE2400 microanalyzer in our laboratories, and UV-Vis spectra were recorded on Cary 50 spectrophotometer. UV-vis/near-IR spectra was recorded on Perkin-Elmer Lambda 1050 UV/vis/NIR spectrophotometer in Prof. YuHuang Wang's lab at University of Maryland. 1,3-Propanedithiol and 1,4-butanedithiol were obtained from Acros and were stored over activated 4 Å molecular sieves under nitrogen.

***In situ* UV-vis/near IR spectral analysis of [Cu<sub>2</sub>S<sub>2</sub>]<sup>+</sup>. 3<sup>+</sup>OTf and 4<sup>+</sup>OTf** were generated at -40 °C or RT in CH<sub>2</sub>Cl<sub>2</sub> followed by immediate analysis. Solutions of these cations were made *in situ* immediately before use.

*[[Cl<sub>2</sub>IPr]Cu]<sub>2</sub>(μ-S(CH<sub>2</sub>)<sub>3</sub>S)]<sup>+</sup>OTf (3<sup>+</sup>OTf)*: A solution of [Cp<sub>2</sub>Fe]OTf (0.3 mL, 1 mM) was added to a solution of **3** (0.30 mL, 1 mM, in 2.4 mL CH<sub>2</sub>Cl<sub>2</sub>) with syringe to give 0.1 mM concentrations of [Cp<sub>2</sub>Fe]OTf and **3** prior to reaction. The colorless solution immediately turned to green. UV-vis/near IR (CH<sub>2</sub>Cl<sub>2</sub>, nm, (cm<sup>-1</sup>M<sup>-1</sup>, RT): 610 (1260), 1150 (1180). The values of molar absorptivity may be considered as lower limits due to the instability of 3<sup>+</sup>. Titration of **3** with varying equiv. [Cp<sub>2</sub>Fe]OTf at -20 °C (see below) did not reliably give the molar absorptivity of **3** due to the instability of cationic 3<sup>+</sup>.

*[[Cl<sub>2</sub>IPr]Cu]<sub>2</sub>(μ-S(CH<sub>2</sub>)<sub>4</sub>S)]<sup>+</sup>OTf (4<sup>+</sup>OTf)*: A similar procedure was used to generate 4<sup>+</sup>OTf *in situ* as described for the preparation of 3<sup>+</sup>OTf.

Neutral **4** was titrated via UV-vis spectroscopy with increasing equivalents of [Cp<sub>2</sub>Fe]OTf to establish the stoichiometry of this reaction as well as the molar absorptivity of 4<sup>+</sup> (Fig. S1). **4** (0.057 g, 0.050 mmol) was dissolved in 2 mL CH<sub>2</sub>Cl<sub>2</sub>. The solution was analytically transferred to a 10.00 mL volumetric flask and diluted to 10.00 mL with CH<sub>2</sub>Cl<sub>2</sub> to give a 5 mM solution of **4**. This solution of **4** in CH<sub>2</sub>Cl<sub>2</sub> solution (0.600 mL, 5 mM, 3 μmol) along with various amount of CH<sub>2</sub>Cl<sub>2</sub> were placed in a quartz cuvette with a screw top and septum. The cuvette was cooled to

-20 °C in the UV-vis spectrometer. Five solutions of  $4^+OTf$  at varying concentrations were made with various concentrations of  $[Cp_2Fe]OTf$  corresponding to the addition of 0.25, 0.50, 0.75, 1.00, and 1.25 equiv.  $[Cp_2Fe]OTf$  to **4** (Table S1). The maximum value of Abs(645 nm) is obtained after addition of 1.00 equiv.  $[Cp_2Fe]OTf$  to **4**; addition of excess oxidant results in a lower absorbance at 645 nm suggesting some decay of  $4^+$ . UV-vis/near-IR for  $4^+$  ( $CH_2Cl_2$ , nm,  $(cm^{-1}M^{-1})$ , -40 °C): 645 (3050), 1160 (2960).

**Table 1** Reaction of **4** and  $[Cp_2Fe](OTf)^-$  to form  $4^+(OTf)^-$  *in situ*.

| $4^+OTf$ | <b>4</b><br>(5 mM) | $[Cp_2Fe]^+(OTf)^-$<br>(5 mM) | $CH_2Cl_2$ |
|----------|--------------------|-------------------------------|------------|
| 0.25 mM  | 0.6 mL             | 0.15 mL                       | 2.25 mL    |
| 0.50 mM  | 0.6 mL             | 0.30 mL                       | 2.10 mL    |
| 0.75 mM  | 0.6 mL             | 0.45 mL                       | 1.95 mL    |
| 1.00 mM  | 0.6 mL             | 0.60 mL                       | 1.80 mL    |
| 1.00 mM  | 0.6 mL             | 0.75 mL                       | 1.65 mL    |

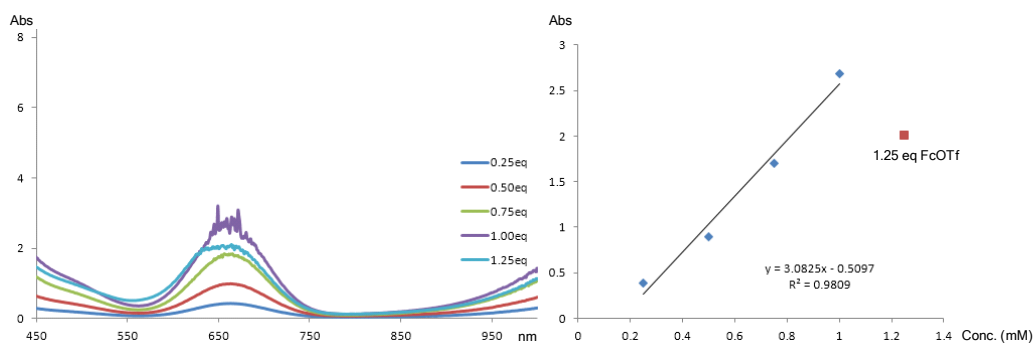

**Figure S1.** Titration of **4** (1 mM) with 0.25, 0.50, 0.75, 1.00 and 1.25 equiv.  $[Cp_2Fe]^+(OTf)^-$  in  $CH_2Cl_2$  at -20 °C.

### Kinetics of $[{\{[Cl_2IPr]Cu\}_2(\mu-S(CH_2)_4S)}]^+(OTf)^-$ ( $4^+OTf$ ) decomposition.

**4** (0.057 g, 0.050 mmol) was dissolved in 2 mL  $CH_2Cl_2$ . The solution was analytically transferred to a 10.00 mL volumetric flask and diluted to 10.00 mL with  $CH_2Cl_2$  to give a 5 mM solution of **4**. This solution of **4** in  $CH_2Cl_2$  solution (0.600 mL, 5 mM, 3  $\mu$ mol) along with 2.1 mL  $CH_2Cl_2$  were placed in a quartz cuvette with a screw top and septum. The cuvette was cooled to -20 °C in the UV-vis spectrometer. A  $CH_2Cl_2$  solution of  $[Cp_2Fe]^+OTf$  (0.3 mL, 10 mM) was then syringed into the cuvette. Maintaining the temperature at -20 °C, scans were taken every 5 minutes. Two bands with  $\lambda_{max} = 645$  and 1150 nm corresponding to  $[{\{[Cl_2IPr]Cu\}_2(\mu-S(CH_2)_4S)}]OTf$  reached maximum immediately after the addition of  $[Cp_2Fe]OTf$  and slowly lost intensity over the course of 8 h. A plot of  $\ln[A_{645}]$  vs. time reveals a straight line pointing to a first-order decomposition of  $4^+$  under these conditions for which the first order rate constant  $k = 6.8(2) \times 10^{-5} s^{-1}$  may be obtained with  $t_{1/2} = 4.1$  h.

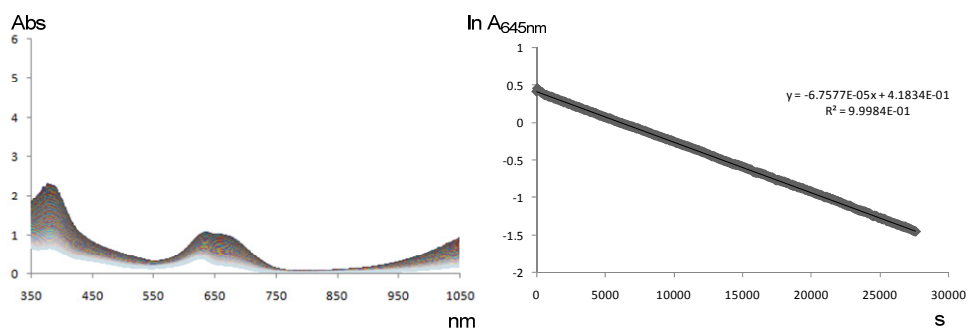

**Figure S2.** (a) Decomposition of 4<sup>+</sup>OTf followed by UV-vis spectroscopy in CH<sub>2</sub>Cl<sub>2</sub> at -20 °C (5 min/scan, 8h total time interval), (b) plot of ln[A<sub>645</sub>] vs. time(s).

**Cyclic Voltammetry Details.** Cyclic voltammetry measurements were done in an N<sub>2</sub> atmosphere using BASi Epsilon Electrochemistry System with three electrodes (Pseudo-reference: Ag wire; Working: Glassy Carbon; Auxillary: Platinum). The [Bu<sub>4</sub>N]PF<sub>6</sub> electrolyte was recrystallized from ethanol and thoroughly dried prior to use.

**General Reference for cyclic voltammetry details.**

(a) Connelly, N. G.; Geiger, W. E. *Chem. Rev.* **1996**, *96*, 877-910.

***In situ* cyclic voltammetry analysis of [Cu<sub>2</sub>S<sub>2</sub>]<sup>+</sup> (Fig 9a and 9b in manuscript).** 3<sup>+</sup>BF<sub>4</sub> and 4<sup>+</sup>BF<sub>4</sub> were generated *in situ* at low temperature in CH<sub>2</sub>Cl<sub>2</sub> followed by immediate CV analysis.

**3** (0.012 g, 0.010 mmol) and the electrolyte [Bu<sub>4</sub>N]PF<sub>6</sub> (0.775 g, 2.0 mmol) were dissolved in 4 mL CH<sub>2</sub>Cl<sub>2</sub>. The solution was transferred to a standard three-electrode electrochemical cell. Due to the instability of 3<sup>+</sup> at room temperature, the solution of **3** was cooled at -40 °C for 5 minutes inside the cell. A cold CH<sub>2</sub>Cl<sub>2</sub> solution of [Cp<sub>2</sub>Fe]<sup>+</sup>BF<sub>4</sub> (1 mL, 1 mM) was quickly injected into the cell, and a scan was taken immediately after the color of the resulted solution changed into dark green indicating the formation of 3<sup>+</sup>. A similar procedure was used to generate 4<sup>+</sup>BF<sub>4</sub> *in situ* for CV analysis.

**Figure S3.** Cyclic voltammogram of {[Cl<sub>2</sub>IPr]Cu}<sub>2</sub>(μ-S(CH<sub>2</sub>)<sub>3</sub>S) (**3**) and ferrocene standards in THF at 2.0 mM and 1.0 mM concentrations, respectively. Horizontal axis in volts.

Electrolyte: 0.40 M NBu<sub>4</sub>PF<sub>6</sub> in THF. Scan rate 50 mV/s and 200 mV/s

Ferrocene: 0.81 V vs. NHE<sup>a</sup>

Ferrocene Wave: E<sub>pa</sub> - E<sub>pc</sub> = 0.12 V

E<sub>ox(closed)</sub> = -0.51 V vs. Fc;

E<sub>ox(open)</sub> = +0.63 V vs. Fc;

E<sub>ox(closed)</sub> = 0.30 vs. NHE;

E<sub>ox(open)</sub> = 1.44 V vs. NHE;

E<sub>pa</sub> - E<sub>pc</sub> = 0.15 V.

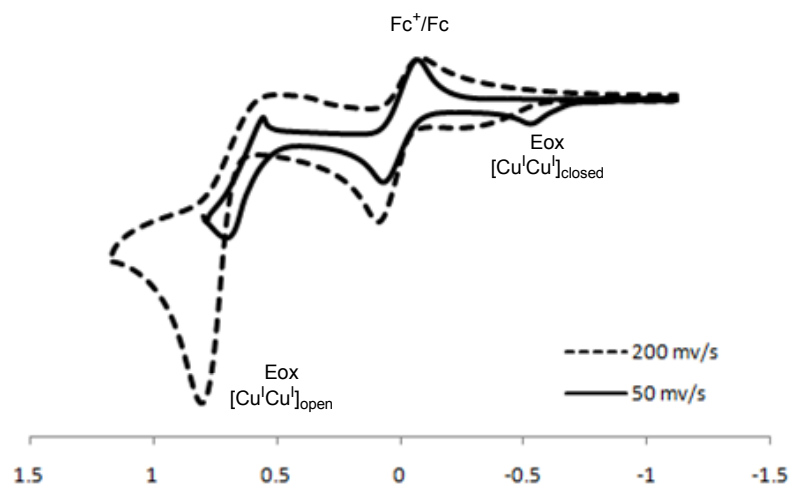

**Figure S4.** Cyclic voltammogram of  $\{[\text{Cl}_2\text{IPr}]\text{Cu}\}_2(\mu\text{-S}(\text{CH}_2)_4\text{S})$  (**4**) and ferrocene standards in THF at 2.0 mM and 1.0 mM concentrations, respectively. Horizontal axis in volts.

Electrolyte: 0.40 M  $\text{NBu}_4\text{PF}_6$  in THF. Scan rate 50 mV/s and 200 mV/s

Ferrocene: 0.81 V *vs.* NHE<sup>a</sup>

Ferrocene Wave:  $E_{\text{pa}} - E_{\text{pc}} = 0.13$  V

$E_{\text{ox(closed)}} = -0.43$  V *vs.* Fc;

$E_{\text{ox(open)}} = 0.95$  V *vs.* Fc;

$E_{\text{ox(closed)}} = 0.38$  V *vs.* NHE;

$E_{\text{ox(open)}} = 1.76$  V *vs.* NHE;

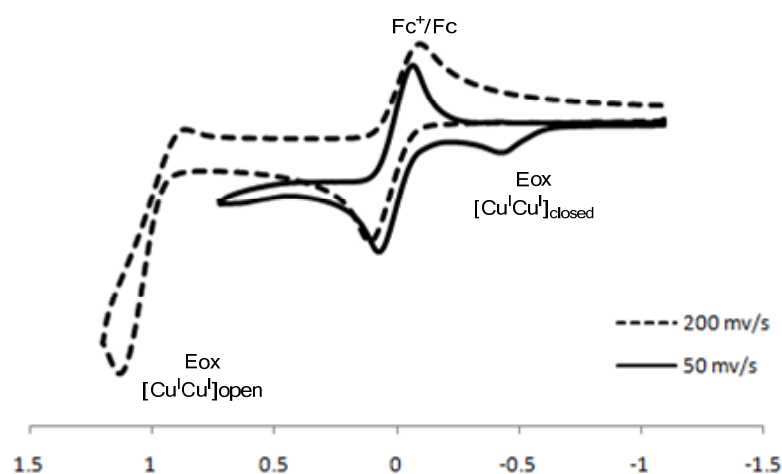

**Figure S5.** Cyclic voltammogram of  $[\text{Cl}_2\text{IPr}]\text{Cu-SCH}_2\text{CH}_2\text{Ph}$  (**5**) and ferrocene standards in THF at 2.0 mM and 1.0 mM concentrations, respectively. Horizontal axis in volts.

Electrolyte: 0.40 M  $\text{NBu}_4\text{PF}_6$  in THF. Scan rate 50 mV/s

Ferrocene: 0.81 V vs.  $\text{NHE}^a$

Ferrocene Wave:  $E_{\text{pa}} - E_{\text{pc}} = 0.12$  V

$E_{\text{ox(mononuclear)}} = 1.18$  V vs. Fc ;

$E_{\text{ox(mononuclear)}} = 1.99$  V vs.  $\text{NHE}$ ;

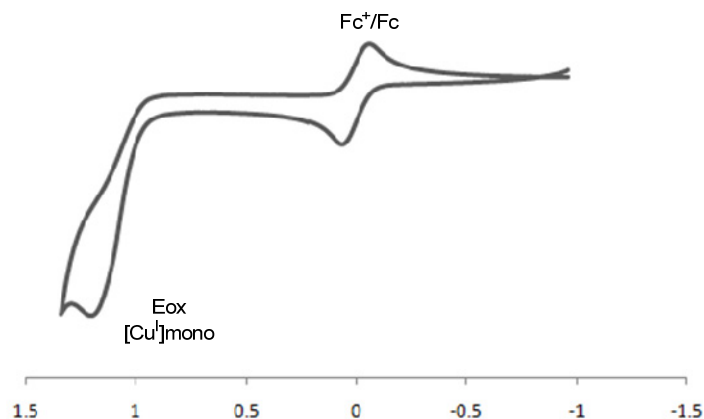

**Figure S6.** Cyclic voltammogram of  $\{[\text{Cl}_2\text{IPr}]\text{Cu}\}_2(\mu\text{-S}(\text{CH}_2)_3\text{S})$  (**3**) in  $\text{CH}_2\text{Cl}_2$  at 2.0 mM concentrations, respectively. Horizontal axis in volts.

Electrolyte: 0.40 M  $\text{NBu}_4\text{PF}_6$  in  $\text{CH}_2\text{Cl}_2$ . Scan rate 50 mV/s, 100 mV/s, 200 mV/s, 400 mV/s.

Ferrocene: 0.81 V vs. NHE<sup>a</sup>

$E_{\text{pa}} - E_{\text{pc}} = 0.10$  V;

$E_{\text{ox}(\text{closed})} = -0.55$  V vs. Fc;

$E_{\text{ox}(\text{open})} = 0.78$  V vs. Fc;

$E_{\text{ox}(\text{closed})} = 0.26$  V vs. NHE;

$E_{\text{ox}(\text{open})} = 1.59$  V vs. NHE.

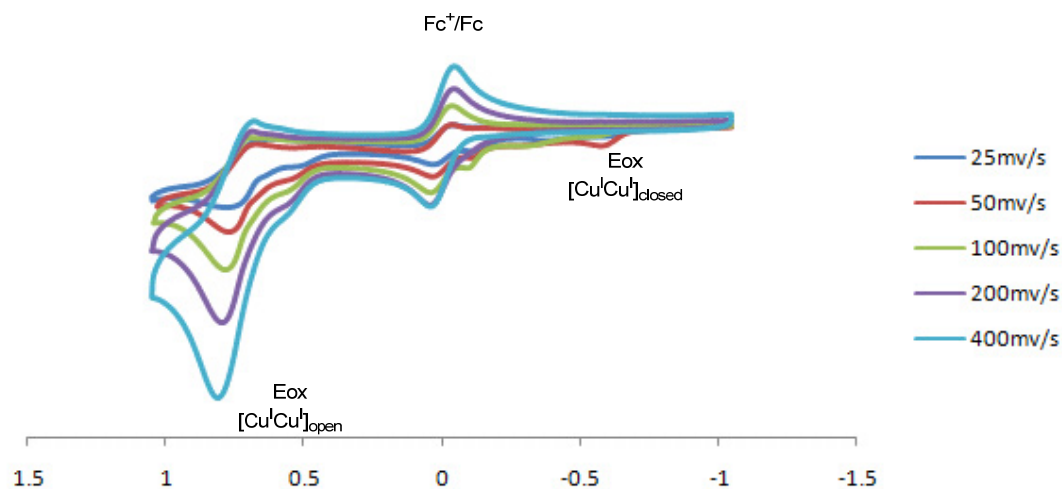



**Figure S7.** Cyclic voltammogram of  $\{[\text{Cl}_2\text{IPr}]\text{Cu}\}_2(\mu\text{-S}(\text{CH}_2)_4\text{S})$  (**4**) and ferrocene standards in  $\text{CH}_2\text{Cl}_2$  at 2.0 mM concentrations, respectively. Horizontal axis in volts.

Electrolyte: 0.40 M  $\text{NBu}_4\text{PF}_6$  in  $\text{CH}_2\text{Cl}_2$ . Scan rate 50 mV/s,

$E_{\text{ox(closed)}} = -0.39 \text{ V vs. Fc}$ ;

$E_{1/2(\text{closed})} = -0.42 \text{ V vs. Fc}$ ;

$E_{1/2(\text{closed})} = 0.39 \text{ V vs. NHE}$ ;

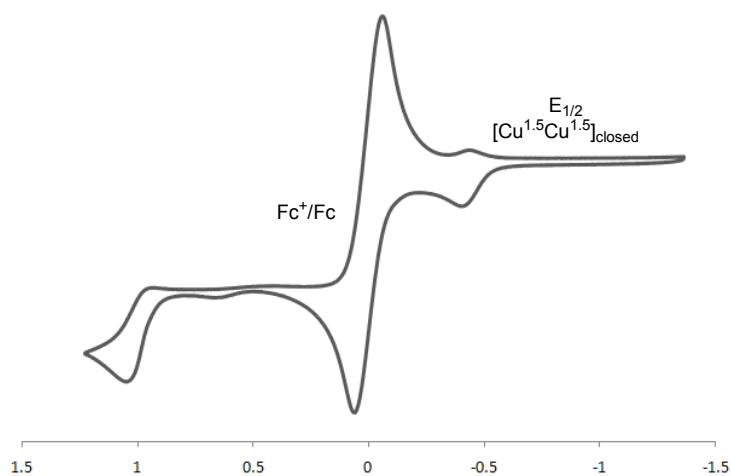

**Figure S8.** Cyclic voltammogram of  $[\text{Cl}_2\text{IPr}]\text{Cu-SCH}_2\text{CH}_2\text{Ph}$  (**5**) and ferrocene standards in  $\text{CH}_2\text{Cl}_2$  at 2.0 mM and 1.0 mM concentrations, respectively. Horizontal axis in volts.

Electrolyte: 0.40 M  $\text{NBu}_4\text{PF}_6$  in  $\text{CH}_2\text{Cl}_2$ . Scan rate 50 mV/s

Ferrocene: 0.81 V vs.  $\text{NHE}^a$

Ferrocene Wave:  $E_{\text{pa}} - E_{\text{pc}} = 0.12$  V

$E_{\text{ox(mononuclear)}} = 1.10$  V vs. Fc ;

$E_{\text{ox(mononuclear)}} = 1.91$  V vs.  $\text{NHE}$ ;

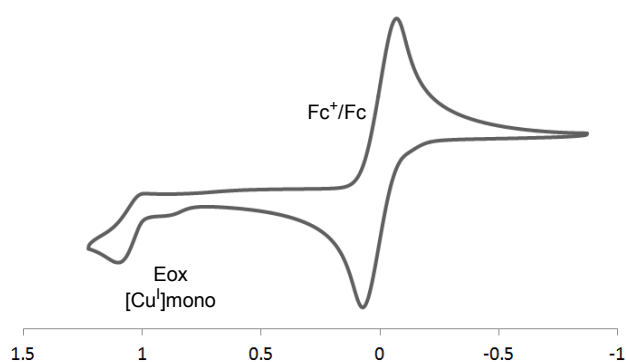

### DFT Calculation Details

The DFT calculations employed the Becke-Perdew exchange correlation functional [1] using the Amsterdam Density Functional suite of programs (ADF 2007.01) [2]. Slater-type orbital (STO) basis sets employed for H, C, and N atoms were of triple-quality augmented with two polarization functions (ZORA/TZ2P) while an improved triple- $\zeta$  basis set with two polarization functions (ZORA/TZ2P+) was employed for the Cu atom. Scalar relativistic effects were included by virtue of the zero order regular approximation (ZORA) [3]. The 1s electrons of C and N as well as the 1s – 2p electrons of Cu were treated as frozen core. The VWN (Vosko, Wilk, and Nusair) functional was used for LDA (local density approximation) [4]. Mostly default convergence ( $E = 1 \times 10^{-4}$  hartree (default =  $1 \times 10^{-3}$  hartree), max. gradient =  $1 \times 10^{-2}$  hartree / Å, max. Cartesian step =  $1 \times 10^{-2}$  Å) and integration (4 significant digits) parameters were employed for geometry optimizations.

Experimental X-ray coordinates for **3** were used as the starting point for the geometry optimization of these species in unrestricted ( $S = 1/2$ ) calculations specifying 1 unpaired electron (spin  $\alpha$  – spin  $\beta$ ). ADFview [2a] was used to prepare the three-dimensional representations of the structures as well as to render the Kohn-Sham MOs which appear in Figures S10, S12, S14, S16 as well as the net spin density contour plots in Figures S10, S14. Converged DFT atomic coordinates for **3**<sup>+</sup> and **4**<sup>+</sup> are collected in Tables S3 and S4, respectively.

[1] (a) Becke, A. *Phys. Rev. A* **1988**, 38, 3098. (b) Perdew, J. P. *Phys. Rev. B* **1986**, 34, 7406. (c) Perdew, J. P. *Phys. Rev. B* **1986**, 33, 8822.

[2] (a) <http://www.scm.com> – last accessed June 24, 2012. (b) te Velde, G.; Bickelhaupt, F.M.; Baerends, E. J.; Fonseca Guerra, C.; Van Gisbergen, S. J. A.; Snijders, J. G.; Ziegler, T. *J. Comput. Chem.* **2001**, 22, 931. (c) Fonseca Guerra, C.; Snijders, J. G.; te Velde, G.; Baerends, E. J.; Acc., T. C. *Theor. Chem. Acc.* **1998**, 99, 391.

[3] (a) Snijders, J. G.; Baerends, E. J.; Ros, P. *Mol. Phys.* **1979**, 38, 1909. (b) Ziegler, T.; Tschinke, V.; Baerends, E. J.; Snijders, J. G.; Ravenek, W. K. *J. Phys. Chem.* **1989**, 93, 3050. (c) van Lenthe, E.; Baerends, E. J.; Snijders, J. G. *J. Chem. Phys.* **1993**, 99, 4597.

[4] Vosko, S. H.; Wilk, L.; Nusair, M. *Can. J. Phys.* **1980**, 58, 1200.

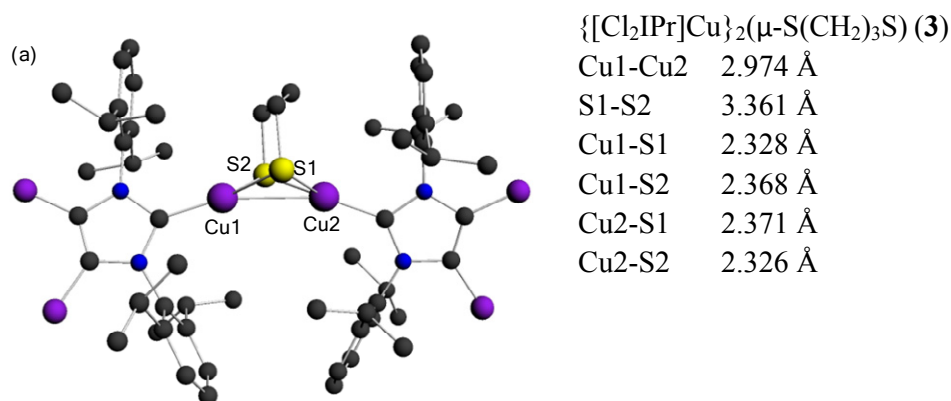

**Figure S9.** DFT structure for  $\{[\text{Cl}_2\text{IPr}]\text{Cu}\}_2(\mu\text{-S}(\text{CH}_2)_3\text{S})$  (**3**) along with selected bond distances.

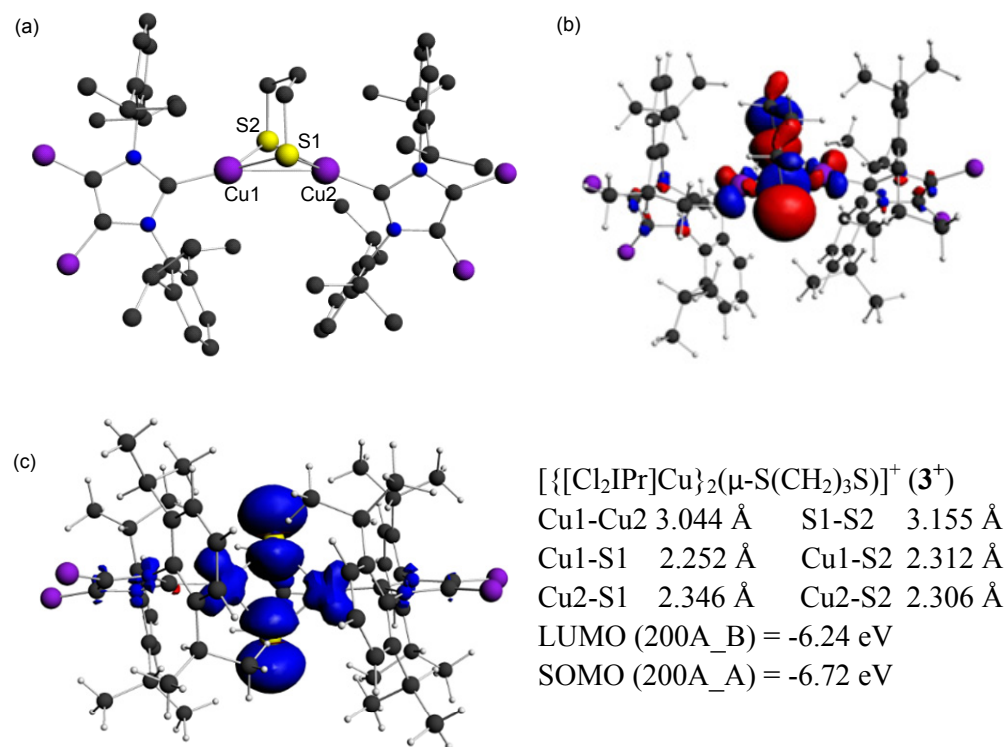

**Figure S10.** (a) DFT structure, (b) contour plot of SOMO (spin  $\alpha$ ; upper right) (c) spin density plot (blue = excess spin  $\alpha$ , red = excess spin  $\beta$  (0.001 isospin value)) for  $[\{[\text{Cl}_2\text{IPr}]\text{Cu}\}_2(\mu\text{-S}(\text{CH}_2)_3\text{S})]^+$  (**3**<sup>+</sup>) with selected bond distances from the optimized DFT structure. DFT electron spin densities predicted: Cu1 0.13 e<sup>-</sup>; Cu2 0.15 e<sup>-</sup>; S1 0.33 e<sup>-</sup>; S2 0.33 e<sup>-</sup>.

**Table S2.** Observed vs. TD-DFT calculated low energy electronic transitions for  $3^+$ .

| Optical Transition<br>(nm ( $M^{-1}cm^{-1}$ )) | Calculated<br>Transition (nm) | Oscillator<br>Strength | Principal Components                                                                                  |
|------------------------------------------------|-------------------------------|------------------------|-------------------------------------------------------------------------------------------------------|
| 610 (1260)                                     | 653                           | 0.023                  | 191a $\rightarrow$ 200a (66.9%)<br>193a $\rightarrow$ 200a (18.0%)<br>192a $\rightarrow$ 200a (11.2%) |
| 1150 (1180)                                    | 1140                          | 0.042                  | 199a $\rightarrow$ 200a (72.0%)<br>198a $\rightarrow$ 200a (26.3%)                                    |

**Figure S11.** Observed (black) vs. TD-DFT calculated (red) UV-vis/near IR spectra for  $3^+$ .

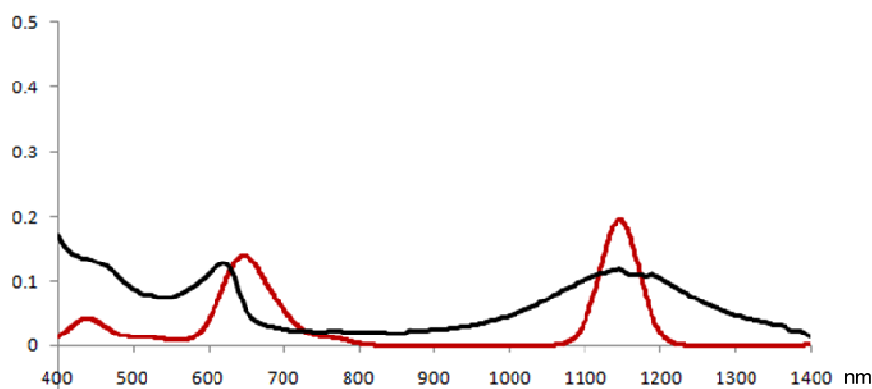

**Figure S12.** Contour plots of spin  $\beta$  Kohn-Sham MOs involved in key optical and near IR transitions for  $3^+$ : (a) 191a, (b) 193a (c) 199a, (d) 200a.

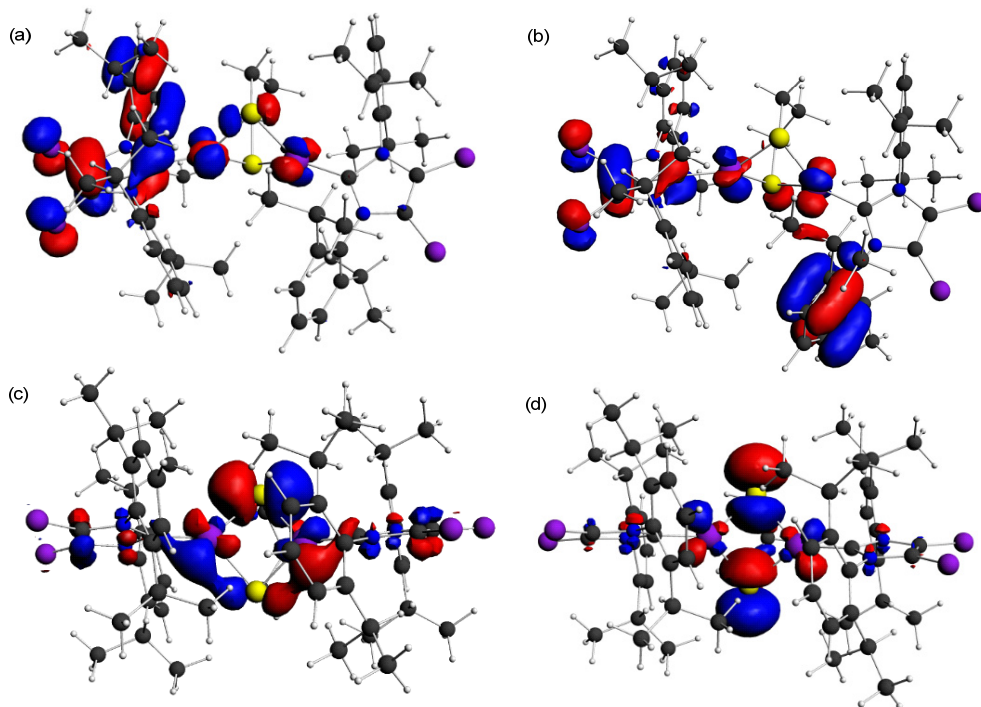

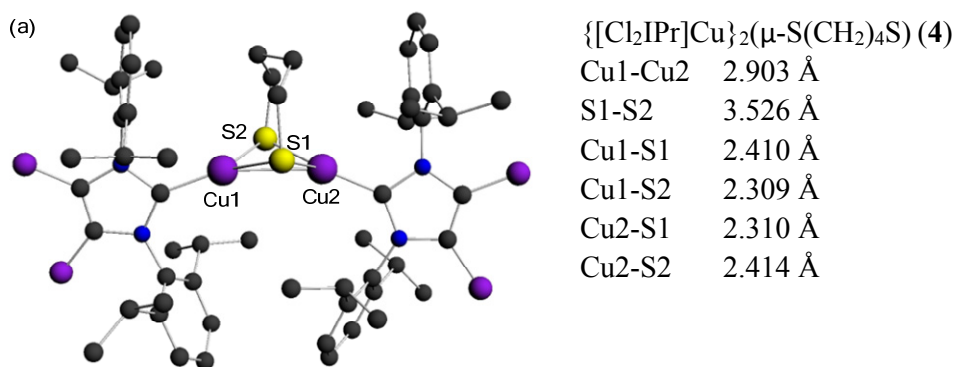

**Figure S13.** DFT structure for  $\{[\text{Cl}_2\text{IPr}]\text{Cu}\}_2(\mu\text{-S}(\text{CH}_2)_4\text{S})$  (**4**) along with selected bond distances.

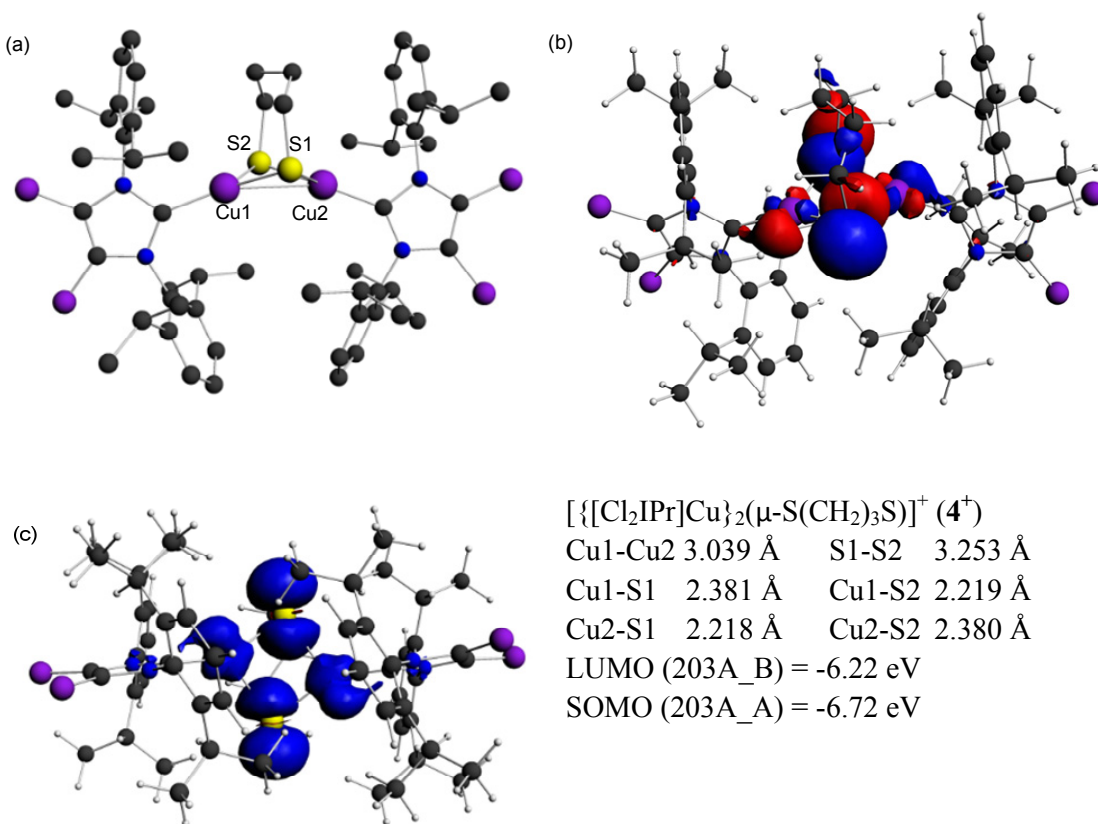

**Figure S14.** DFT structure (left), contour plot of SOMO (spin  $\alpha$ ; middle), and spin density plot (right; blue = excess spin  $\alpha$ , red = excess spin  $\beta$  (0.001 isospin value)) for  $\{[\text{Cl}_2\text{IPr}]\text{Cu}\}_2(\mu\text{-S}(\text{CH}_2)_3\text{S})^+$  (**4**<sup>+</sup>) with selected bond distances and angles from the optimized DFT structure. DFT electron spin densities predicted: Cu1 0.15 e<sup>-</sup>; Cu2 0.15 e<sup>-</sup>; S1 0.32 e<sup>-</sup>; S2 0.32 e<sup>-</sup>.

**Table S3.** Observed vs. TD-DFT calculated low energy electronic transitions for  $4^+$ .

| Optical Transition<br>(nm ( $M^{-1}cm^{-1}$ )) | Calculated<br>Transition (nm) | Oscillator<br>Strength | Principal Components                                               |
|------------------------------------------------|-------------------------------|------------------------|--------------------------------------------------------------------|
| 645 (3050)                                     | 590                           | 0.015                  | 195a $\rightarrow$ 203a (82.0%)<br>193a $\rightarrow$ 203a (13.0%) |
| 1150 (2960)                                    | 1073                          | 0.034                  | 202a $\rightarrow$ 203a (94.6%)<br>200a $\rightarrow$ 203a (2.2%)  |

**Figure S15.** Observed (black) vs. TD-DFT calculated (red) UV-vis/near IR spectra for  $4^+$ .

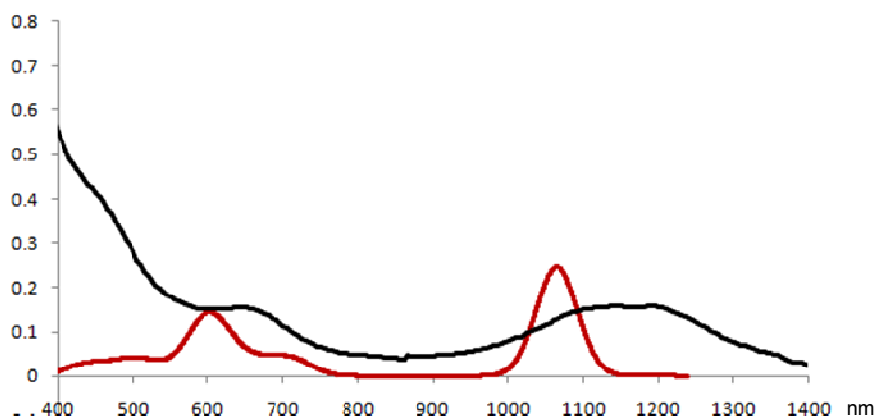

**Figure S16.** Contour plots of spin  $\beta$  Kohn-Sham MOs involved in key optical and nearIR transitions for  $4^+$  (a) 193a, (b) 195a, (c) 202a, (d) 203a.

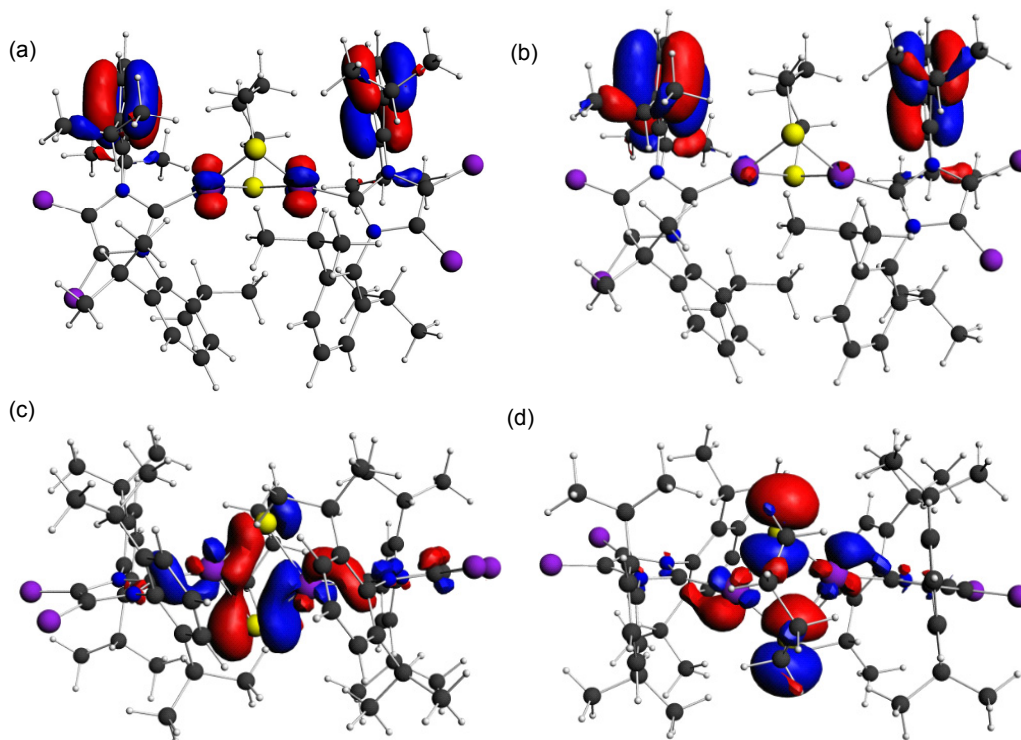

**Table S4.** DFT optimized coordinates for  $[[\text{Cl}_2\text{IPr}]\text{Cu}]_2(\mu\text{-S}(\text{CH}_2)_3\text{S})]^+ (\mathbf{3}^+)$

|    | Atom | X           | Y           | Z           | (Angstrom) |
|----|------|-------------|-------------|-------------|------------|
| 1  | Cu   | 1.14313507  | 1.04323588  | -0.16232884 |            |
| 2  | Cu   | -1.86067889 | 0.98746576  | 0.32531626  |            |
| 3  | S    | -0.19331811 | 1.7550081   | 1.62930328  |            |
| 4  | S    | -0.62262257 | 1.69299027  | -1.49572907 |            |
| 5  | N    | 4.05480028  | 1.22746123  | -0.12355826 |            |
| 6  | N    | -4.72739275 | 1.25545128  | 0.41336756  |            |
| 7  | C    | 2.95041857  | 0.40023958  | -0.27713435 |            |
| 8  | C    | -3.65694904 | 0.44813788  | 0.5188148   |            |
| 9  | N    | 3.45575443  | -0.84281821 | -0.53348515 |            |
| 10 | N    | -4.1926138  | -0.76449488 | 0.7624108   |            |
| 11 | C    | 4.00395539  | 3.5129399   | -0.98768627 |            |
| 12 | C    | -4.71965604 | 3.56876455  | 1.18357275  |            |
| 13 | C    | 2.7290377   | -2.05199777 | -0.780117   |            |
| 14 | C    | -3.41131451 | -1.9975257  | 0.93608999  |            |
| 15 | C    | 2.15365379  | -2.70344817 | 0.34478616  |            |
| 16 | C    | -2.86537844 | -2.6593434  | -0.20136289 |            |
| 17 | C    | 5.20987663  | 0.51021723  | -0.32290598 |            |
| 18 | C    | -5.90636435 | 0.53187374  | 0.52830256  |            |
| 19 | Cl   | 6.78927198  | 1.2055144   | -0.35164768 |            |
| 20 | Cl   | -7.40317209 | 1.20346761  | 0.45838941  |            |
| 21 | C    | 3.95481544  | 2.67363446  | 0.13063146  |            |
| 22 | C    | -4.66082903 | 2.66945648  | 0.15673004  |            |
| 23 | C    | 3.85304598  | 3.0961228   | 1.46718926  |            |
| 24 | C    | -4.55435692 | 3.11710348  | -1.2478095  |            |
| 25 | C    | 2.22281928  | -2.15636311 | 1.73935729  |            |
| 26 | C    | -2.93267287 | -2.12665447 | -1.61781361 |            |
| 27 | H    | 2.72616077  | -1.10190075 | 1.6865099   |            |
| 28 | H    | -3.35458365 | -1.21575903 | -1.48982324 |            |
| 29 | C    | 4.07859937  | 3.07181149  | -2.43272371 |            |
| 30 | C    | -4.8291496  | 3.03319602  | 2.57852322  |            |
| 31 | H    | 4.28251367  | 1.99512426  | -2.43835095 |            |
| 32 | H    | -5.03413873 | 1.96369653  | 2.50203253  |            |
| 33 | C    | 4.83477837  | -0.8096185  | -0.53566091 |            |
| 34 | C    | -5.54484451 | -0.75048244 | 0.75861006  |            |
| 35 | Cl   | 5.82771068  | -2.14402639 | -0.75816314 |            |
| 36 | Cl   | -6.51929953 | -2.09346928 | 0.98980452  |            |
| 37 | C    | 3.86785821  | 2.13951074  | 2.62591732  |            |
| 38 | C    | -4.58461216 | 2.11313454  | -2.47576215 |            |
| 39 | H    | 3.51837086  | 1.1487291   | 2.25415571  |            |
| 40 | H    | -4.17979969 | 1.11470747  | -2.10839165 |            |
| 41 | C    | 3.81343881  | 5.35189469  | 0.62825919  |            |



|    |   |             |             |             |
|----|---|-------------|-------------|-------------|
| 42 | C | -4.51453845 | 5.43449879  | -0.34650489 |
| 43 | H | 3.74515064  | 6.40284516  | 0.80581566  |
| 44 | H | -4.39199805 | 6.44763336  | -0.56238053 |
| 45 | C | 1.99754087  | -3.77413993 | -2.28950467 |
| 46 | C | -2.6805369  | -3.75381313 | 2.39621039  |
| 47 | H | 1.86628192  | -4.138999   | -3.26027454 |
| 48 | H | -2.60703183 | -4.28523163 | 3.42895195  |
| 49 | C | 3.94583956  | 4.8931267   | -0.7133029  |
| 50 | C | -4.6078841  | 4.9168753   | 0.91508374  |
| 51 | H | 3.96428092  | 5.594638    | -1.54573994 |
| 52 | H | -4.56559079 | 5.58594194  | 1.69617605  |
| 53 | C | 1.52165149  | -3.96881391 | 0.14500859  |
| 54 | C | -2.24164791 | -3.9361511  | 0.02044972  |
| 55 | H | 1.06704606  | -4.45440895 | 1.02974898  |
| 56 | H | -1.8470318  | -4.47536229 | -0.79409029 |
| 57 | C | 1.4806162   | -4.49902749 | -1.17368842 |
| 58 | C | -2.12804646 | -4.49080633 | 1.31488425  |
| 59 | H | 0.97253001  | -5.43437728 | -1.31620905 |
| 60 | H | -1.67321241 | -5.43630159 | 1.52739436  |
| 61 | C | 3.81494418  | 4.45485897  | 1.72456888  |
| 62 | C | -4.4873678  | 4.58001164  | -1.43284738 |
| 63 | H | 3.74764853  | 4.77828757  | 2.72855155  |
| 64 | H | -4.40406652 | 5.01095     | -2.47437701 |
| 65 | C | 3.20900344  | -1.77900769 | -3.29374264 |
| 66 | C | -3.94104675 | -1.74497149 | 3.45525892  |
| 67 | H | 4.08570137  | -1.23321304 | -2.94365995 |
| 68 | H | -4.8178636  | -1.15094386 | 3.19299811  |
| 69 | C | 2.67786841  | -2.56991096 | -2.0785016  |
| 70 | C | -3.32177724 | -2.50800459 | 2.23245822  |
| 71 | C | 2.10933691  | -0.78395077 | -3.78917289 |
| 72 | C | -2.84898932 | -0.70566158 | 3.95890954  |
| 73 | H | 1.28427567  | -1.28302686 | -4.1559363  |
| 74 | H | -1.91293397 | -1.25372871 | 4.30515233  |
| 75 | H | 2.40814534  | -0.20237047 | -4.60643489 |
| 76 | H | -3.27767806 | -0.11495466 | 4.78229163  |
| 77 | H | 1.8001199   | -0.11874516 | -2.97967777 |
| 78 | H | -2.55483071 | -0.03332751 | 3.22753494  |
| 79 | C | 0.81470022  | -2.03295647 | 2.48784854  |
| 80 | C | -1.5080223  | -2.03536723 | -2.21772223 |
| 81 | H | 0.11961273  | -1.44571216 | 1.94689203  |
| 82 | H | -0.89660242 | -1.4111174  | -1.64483059 |
| 83 | H | 0.89760824  | -1.61280583 | 3.49179486  |
| 84 | H | -1.60298051 | -1.65261469 | -3.174146   |
| 85 | H | 0.26735209  | -2.93847025 | 2.58555173  |

|     |   |             |             |             |
|-----|---|-------------|-------------|-------------|
| 86  | H | -1.1219686  | -2.96679584 | -2.34732178 |
| 87  | C | 3.64643778  | -2.70261071 | -4.45162355 |
| 88  | C | -4.39757478 | -2.68488279 | 4.5590049   |
| 89  | H | 4.32890238  | -3.42676612 | -4.08766632 |
| 90  | H | -5.01437598 | -3.38271601 | 4.19974497  |
| 91  | H | 4.0872763   | -2.09884427 | -5.19110067 |
| 92  | H | -4.90670523 | -2.10013139 | 5.29372405  |
| 93  | H | 2.82533981  | -3.18254647 | -4.84696198 |
| 94  | H | -3.55286807 | -3.19551158 | 5.01908177  |
| 95  | C | 2.74135727  | 3.27791547  | -3.1691356  |
| 96  | C | -3.45179459 | 3.25184115  | 3.36027316  |
| 97  | H | 1.9406165   | 2.79187231  | -2.67119098 |
| 98  | H | -2.65135679 | 2.7089112   | 2.9054873   |
| 99  | H | 2.81327592  | 2.91369825  | -4.19394553 |
| 100 | H | -3.52607423 | 2.90587433  | 4.45757663  |
| 101 | H | 2.44495778  | 4.30455952  | -3.21871758 |
| 102 | H | -3.14973057 | 4.30476513  | 3.39414513  |
| 103 | C | 3.19473267  | -3.05554909 | 2.61816442  |
| 104 | C | -3.87126635 | -3.06968412 | -2.46845659 |
| 105 | H | 3.30848742  | -2.70263795 | 3.75684451  |
| 106 | H | -4.00573487 | -2.67111487 | -3.41722143 |
| 107 | H | 4.24874293  | -3.17281454 | 2.21495277  |
| 108 | H | -4.80322565 | -3.17222547 | -1.97822923 |
| 109 | H | 2.79129701  | -4.15238731 | 2.69899359  |
| 110 | H | -3.47486301 | -4.00768446 | -2.61573799 |
| 111 | C | 2.96488233  | 2.55894853  | 3.78034928  |
| 112 | C | -3.63270561 | 2.54032548  | -3.6645968  |
| 113 | H | 3.31707036  | 3.46118306  | 4.22416868  |
| 114 | H | -3.96492612 | 3.49405728  | -4.23028405 |
| 115 | H | 2.98360147  | 1.76866228  | 4.50141058  |
| 116 | H | -3.63487366 | 1.739954    | -4.41135187 |
| 117 | H | 1.9619668   | 2.6742149   | 3.46923665  |
| 118 | H | -2.57442381 | 2.71820524  | -3.38674268 |
| 119 | C | 5.34288613  | 1.92429885  | 3.13067663  |
| 120 | C | -6.1003518  | 1.90175104  | -2.95755028 |
| 121 | H | 5.97152565  | 1.59713888  | 2.30963923  |
| 122 | H | -6.75284214 | 1.52973295  | -2.22478844 |
| 123 | H | 5.38098554  | 1.12330162  | 3.92426789  |
| 124 | H | -6.14384374 | 1.17777829  | -3.77052167 |
| 125 | H | 5.7742587   | 2.85336472  | 3.52012551  |
| 126 | H | -6.60180206 | 2.8054733   | -3.32597123 |
| 127 | C | 5.23652326  | 3.7586236   | -3.19686383 |
| 128 | C | -5.96144654 | 3.72762241  | 3.33820408  |
| 129 | H | 5.11465935  | 4.8020209   | -3.32612545 |

|     |   |             |            |             |
|-----|---|-------------|------------|-------------|
| 130 | H | -5.80230459 | 4.81794622 | 3.47339702  |
| 131 | H | 5.31140715  | 3.35874815 | -4.20018334 |
| 132 | H | -6.0405934  | 3.23486766 | 4.31773451  |
| 133 | H | 6.18213335  | 3.60529835 | -2.69807192 |
| 134 | H | -6.88580305 | 3.59680195 | 2.81204176  |
| 135 | C | 0.08576503  | 4.04680699 | -0.02542258 |
| 136 | H | 1.1920198   | 3.82806011 | -0.22186924 |
| 137 | H | 0.04761395  | 5.1398498  | -0.02235097 |
| 138 | C | -0.36176757 | 3.57102672 | 1.38760251  |
| 139 | H | -1.30188101 | 3.85696161 | 1.65451943  |
| 140 | H | 0.28877237  | 3.99381439 | 2.12435943  |
| 141 | C | -0.73531713 | 3.54697084 | -1.23688122 |
| 142 | H | -1.75748108 | 3.81857761 | -1.12398548 |
| 143 | H | -0.39209516 | 3.95724003 | -2.16906193 |

**Table S5.** DFT optimized coordinates for  $[[\text{Cl}_2\text{IPrCu}]_2(\mu\text{-S}(\text{CH}_2)_4\text{S})]^+ (4^+)$

|    | Atom | X          | Y           | Z           | (Angstrom) |
|----|------|------------|-------------|-------------|------------|
| 1  | Cu   | 1.80461242 | -0.89664898 | -1.60027392 |            |
| 2  | Cl   | 3.85623284 | -1.9330157  | -6.75859775 |            |
| 3  | Cl   | 3.97635131 | 1.53978325  | -6.33685148 |            |
| 4  | S    | 2.00748664 | -1.37015798 | 0.55724548  |            |
| 5  | N    | 2.8521658  | -1.53028751 | -4.23836454 |            |
| 6  | C    | 0.58778852 | 2.27354526  | -3.53846843 |            |
| 7  | H    | 0.61271021 | 1.18399349  | -3.66787693 |            |
| 8  | C    | 2.61443373 | -0.53963894 | -3.31711168 |            |
| 9  | C    | 3.45752764 | 0.34869709  | -5.23585245 |            |
| 10 | C    | 3.13530993 | 1.93015039  | -3.33508681 |            |
| 11 | C    | 3.38014921 | -1.00282181 | -5.41352422 |            |
| 12 | C    | 6.1050967  | -3.40910548 | -3.56984706 |            |
| 13 | H    | 6.27881342 | -4.48298289 | -3.4110781  |            |
| 14 | H    | 7.02586059 | -2.87436398 | -3.29772178 |            |
| 15 | H    | 5.92025702 | -3.25338668 | -4.64076524 |            |
| 16 | N    | 3.00468327 | 0.61827588  | -3.94218842 |            |
| 17 | C    | 3.40087208 | -4.93121367 | -2.84166909 |            |
| 18 | H    | 4.12163194 | -5.46576912 | -2.22328473 |            |
| 19 | C    | 4.56830776 | 3.67595822  | -2.52080632 |            |
| 20 | H    | 5.55693297 | 4.04886782  | -2.25574881 |            |
| 21 | C    | 1.99465468 | 2.74202332  | -3.1925793  |            |
| 22 | C    | 5.67041396 | 1.47387918  | -3.08879172 |            |
| 23 | H    | 5.42696028 | 0.61148279  | -3.72294345 |            |
| 24 | C    | 4.92674941 | -2.91130975 | -2.70634897 |            |
| 25 | H    | 4.82426772 | -1.83181513 | -2.87286555 |            |
| 26 | C    | 0.08969146 | 2.8974719   | -4.85614898 |            |
| 27 | H    | 0.03392424 | 3.99238898  | -4.77087973 |            |

|    |    |             |             |             |
|----|----|-------------|-------------|-------------|
| 28 | H  | -0.91772512 | 2.52590616  | -5.09165096 |
| 29 | H  | 0.75133822  | 2.65830635  | -5.69903511 |
| 30 | C  | 2.66517092  | -2.93771238 | -3.95539914 |
| 31 | C  | 3.46419113  | 4.51419863  | -2.40252067 |
| 32 | H  | 3.59647505  | 5.53892611  | -2.05834935 |
| 33 | C  | 0.48549868  | -3.64260295 | -6.79276026 |
| 34 | H  | 1.47475591  | -3.69899662 | -7.26293997 |
| 35 | H  | -0.18825542 | -3.10202673 | -7.47139602 |
| 36 | H  | 0.10062342  | -4.66649314 | -6.68786097 |
| 37 | C  | 0.54158999  | -2.92805915 | -5.42857451 |
| 38 | H  | 0.87355049  | -1.89679921 | -5.60507823 |
| 39 | C  | 4.43573037  | 2.36497355  | -2.99299566 |
| 40 | C  | 3.63070803  | -3.5842261  | -3.15115917 |
| 41 | C  | 1.37578468  | -4.94888403 | -4.15450219 |
| 42 | H  | 0.5168425   | -5.49266281 | -4.54773941 |
| 43 | C  | -0.86589301 | -2.8494539  | -4.81089106 |
| 44 | H  | -1.25026898 | -3.85086467 | -4.56928205 |
| 45 | H  | -1.56445417 | -2.38750638 | -5.52225593 |
| 46 | H  | -0.86211406 | -2.24327907 | -3.89596    |
| 47 | C  | 5.23655856  | -3.10259506 | -1.21308847 |
| 48 | H  | 4.45083159  | -2.66961348 | -0.57990727 |
| 49 | H  | 6.18085797  | -2.60000162 | -0.96393023 |
| 50 | H  | 5.35384489  | -4.16275829 | -0.95040533 |
| 51 | C  | 2.28361182  | -5.60481774 | -3.3289992  |
| 52 | H  | 2.12950279  | -6.65302706 | -3.07565351 |
| 53 | C  | 2.19449661  | 4.04641625  | -2.72135683 |
| 54 | H  | 1.33506647  | 4.70534633  | -2.6076851  |
| 55 | C  | 6.86952153  | 2.18647997  | -3.73931802 |
| 56 | H  | 7.25521593  | 2.99405144  | -3.10210171 |
| 57 | H  | 6.60552382  | 2.61803393  | -4.71312446 |
| 58 | H  | 7.69107853  | 1.4733471   | -3.89069719 |
| 59 | C  | -0.40001556 | 2.57477977  | -2.39994166 |
| 60 | H  | -0.04713809 | 2.17362669  | -1.43967459 |
| 61 | H  | -1.37712604 | 2.1245433   | -2.61797653 |
| 62 | H  | -0.55042946 | 3.65502865  | -2.27266709 |
| 63 | C  | 1.54343281  | -3.59911498 | -4.49393222 |
| 64 | C  | 1.76064877  | -3.21694888 | 0.62075352  |
| 65 | C  | 6.05754046  | 0.92375681  | -1.70117625 |
| 66 | H  | 6.92637515  | 0.25584721  | -1.78760219 |
| 67 | H  | 5.23243653  | 0.36323095  | -1.24260017 |
| 68 | H  | 6.32965898  | 1.74247012  | -1.02017541 |
| 69 | C  | 0.33498424  | -3.75745429 | 0.52406333  |
| 70 | Cu | -0.05287664 | -0.18531625 | 0.69681349  |
| 71 | Cl | -2.26993416 | 0.7817087   | 5.79441046  |

|     |    |             |             |            |
|-----|----|-------------|-------------|------------|
| 72  | Cl | -0.51230931 | 3.68369363  | 4.93259519 |
| 73  | S  | -0.5624006  | -0.8334311  | -1.363747  |
| 74  | N  | -1.24326308 | 0.22962818  | 3.31232636 |
| 75  | C  | 2.70068935  | 2.11163286  | 2.27174276 |
| 76  | H  | 2.10344093  | 1.22427717  | 2.51723966 |
| 77  | C  | -0.52183174 | 0.79913657  | 2.29122188 |
| 78  | C  | -0.7313305  | 2.26001141  | 4.02405296 |
| 79  | C  | 0.35762225  | 3.14434673  | 1.96314299 |
| 80  | C  | -1.3892817  | 1.11662159  | 4.37532568 |
| 81  | C  | -5.01076782 | 0.32121271  | 2.67620291 |
| 82  | H  | -5.73876528 | -0.50200087 | 2.64353456 |
| 83  | H  | -5.5005328  | 1.22020382  | 2.27648994 |
| 84  | H  | -4.75889903 | 0.50560253  | 3.72875114 |
| 85  | N  | -0.22170219 | 2.06186568  | 2.73859499 |
| 86  | C  | -3.5702311  | -2.49792832 | 2.32705401 |
| 87  | H  | -4.47657785 | -2.64024696 | 1.73892319 |
| 88  | C  | 0.06181937  | 5.24996286  | 0.84762953 |
| 89  | H  | -0.58077755 | 6.04837463  | 0.47821903 |
| 90  | C  | 1.7529922   | 3.19986797  | 1.78591804 |
| 91  | C  | -2.03417095 | 4.07983438  | 1.63466581 |
| 92  | H  | -2.27701754 | 3.31945182  | 2.38816536 |
| 93  | C  | -3.7608428  | -0.01980009 | 1.83726455 |
| 94  | H  | -3.08918702 | 0.84691406  | 1.871496   |
| 95  | C  | 3.45468339  | 2.54408551  | 3.54389356 |
| 96  | H  | 4.08630801  | 3.42117451  | 3.3414158  |
| 97  | H  | 4.10788945  | 1.73045738  | 3.88989225 |
| 98  | H  | 2.76727842  | 2.80484082  | 4.3592768  |
| 99  | C  | -1.85237685 | -1.08098443 | 3.22108541 |
| 100 | C  | 1.44005721  | 5.34916896  | 0.68729915 |
| 101 | H  | 1.86782527  | 6.22619303  | 0.20341637 |
| 102 | C  | -0.35782085 | -2.45484678 | 6.25543736 |
| 103 | H  | -1.21599072 | -1.91172856 | 6.6695788  |
| 104 | H  | 0.51053591  | -2.27195764 | 6.90287019 |
| 105 | H  | -0.58379863 | -3.52934545 | 6.29808106 |
| 106 | C  | -0.04161141 | -2.00953393 | 4.81448539 |
| 107 | H  | 0.23424482  | -0.94769883 | 4.84636924 |
| 108 | C  | -0.51627814 | 4.15065327  | 1.49307693 |
| 109 | C  | -3.02820975 | -1.21180575 | 2.44745829 |
| 110 | C  | -1.85556136 | -3.41870305 | 3.75355701 |
| 111 | H  | -1.42240521 | -4.27815341 | 4.26516069 |
| 112 | C  | 1.17811451  | -2.77732262 | 4.27487281 |
| 113 | H  | 0.96025829  | -3.85057238 | 4.17734429 |
| 114 | H  | 2.02706704  | -2.670297   | 4.96406689 |
| 115 | H  | 1.48466796  | -2.39112025 | 3.29452785 |

|     |   |             |             |             |
|-----|---|-------------|-------------|-------------|
| 116 | C | -4.14515852 | -0.22769876 | 0.36338929  |
| 117 | H | -3.25973124 | -0.3923793  | -0.26495783 |
| 118 | H | -4.66200829 | 0.66524091  | -0.0134534  |
| 119 | H | -4.82932582 | -1.07745531 | 0.23421044  |
| 120 | C | -2.98760698 | -3.59095057 | 2.96347123  |
| 121 | H | -3.43029332 | -4.58050955 | 2.85523335  |
| 122 | C | 2.27051324  | 4.33075232  | 1.14064584  |
| 123 | H | 3.34654192  | 4.41114307  | 0.99509284  |
| 124 | C | -2.64764105 | 5.40577911  | 2.11920145  |
| 125 | H | -2.55289111 | 6.19624237  | 1.36209536  |
| 126 | H | -2.17142191 | 5.75991448  | 3.04216233  |
| 127 | H | -3.72019168 | 5.27222395  | 2.31501153  |
| 128 | C | 3.69702035  | 1.69996726  | 1.17503327  |
| 129 | H | 3.18421194  | 1.43346409  | 0.24087191  |
| 130 | H | 4.28086273  | 0.83015826  | 1.50281881  |
| 131 | H | 4.40380948  | 2.50916902  | 0.94728583  |
| 132 | C | -1.26036135 | -2.15889577 | 3.90893387  |
| 133 | C | -1.2878897  | -2.53185315 | -1.11022997 |
| 134 | C | -2.69040691 | 3.63501185  | 0.31222065  |
| 135 | H | -3.77976532 | 3.55778489  | 0.43750294  |
| 136 | H | -2.30923524 | 2.66158119  | -0.02235611 |
| 137 | H | -2.49536535 | 4.36652206  | -0.48460746 |
| 138 | C | -0.32946958 | -3.69609852 | -0.8633846  |
| 139 | H | -1.85007509 | -2.71098941 | -2.03492491 |
| 140 | H | -2.01035928 | -2.45123019 | -0.28761475 |
| 141 | H | 0.43605671  | -3.72842445 | -1.65462515 |
| 142 | H | -0.93467707 | -4.60785501 | -0.99269171 |
| 143 | H | -0.30583608 | -3.26957766 | 1.27516322  |
| 144 | H | 0.4006079   | -4.81552415 | 0.82501755  |
| 145 | H | 2.19671929  | -3.50110724 | 1.58624948  |
| 146 | H | 2.38587337  | -3.65101384 | -0.170148   |

### X-Band EPR Details.

EPR measurements were performed in quartz tubes with J.Young valves. Spectral simulation was performed using the program QCOMP 136 by Prof. Dr. Frank Neese from the Quantum Chemistry Program Exchange as used by Neese *et al.* (*J. Am. Chem. Soc.* 1996, **118**, 8692-8699). The fittings were performed by the “chi by eye” approach. Solution EPR spectra were recorded on a JEOL continuous wave spectrometer JES-FA200 equipped with an X-band Gunn oscillator bridge, a cylindrical mode cavity, and a liquid nitrogen cryostat. For all samples, a modulation frequency of 100 kHz and a time constant of 0.03 s were employed. Spectra were measured in 5 sweeps of 4 min each.

*Sample preparation:* A solution of [Cp<sub>2</sub>Fe]OTf (0.1 mL, 5 mM) was added to a solution of **3** (0.1 mL, 5 mM, in 0.3 mL CH<sub>2</sub>Cl<sub>2</sub>) by syringe under N<sub>2</sub> atmosphere at -78 °C to give a concentration of [Cp<sub>2</sub>Fe]OTf and **3** of 1.0 mM each prior to reaction. After the solution turned green indicating the formation of **3**<sup>+</sup>, the tube was placed in liquid nitrogen to give a frozen glass sample for EPR measurement. A similar procedure was used to generate [ $\{[Cl_2IPr]Cu\}_2(\mu-S(CH_2)_4S)\}^+OTf$  (**4**<sup>+</sup>OTf) *in situ* for EPR measurement. Melting of the frozen samples resulted in a bleaching of the EPR signal.

**Figure S17.** X-band EPR spectrum and simulation for  $[\{[\text{Cl}_2\text{IPr}]\text{Cu}\}_2(\mu\text{-S}(\text{CH}_2)_3\text{S})]^+$  ( $\mathbf{3}^+$ ) (frozen dichloromethane glass, 8.902096 GHz, ModWidth = 0.05 mT, Power = 0.998 mW). Simulation was performed using a 2 Cu model:  $g_1 = 2.085$ ,  $g_2 = 2.015$ ,  $g_3 = 2.015$  with  $A_1(2 \text{ Cu}) = 150 \text{ MHz}$ ,  $A_2(2 \text{ Cu}) = A_3(2 \text{ Cu}) = 40 \text{ MHz}$ . Gaussian lineshape, line broadening  $W1 = 17 \text{ mT}$ ,  $W2 = 17 \text{ mT}$ ,  $W3 = 17 \text{ mT}$ .

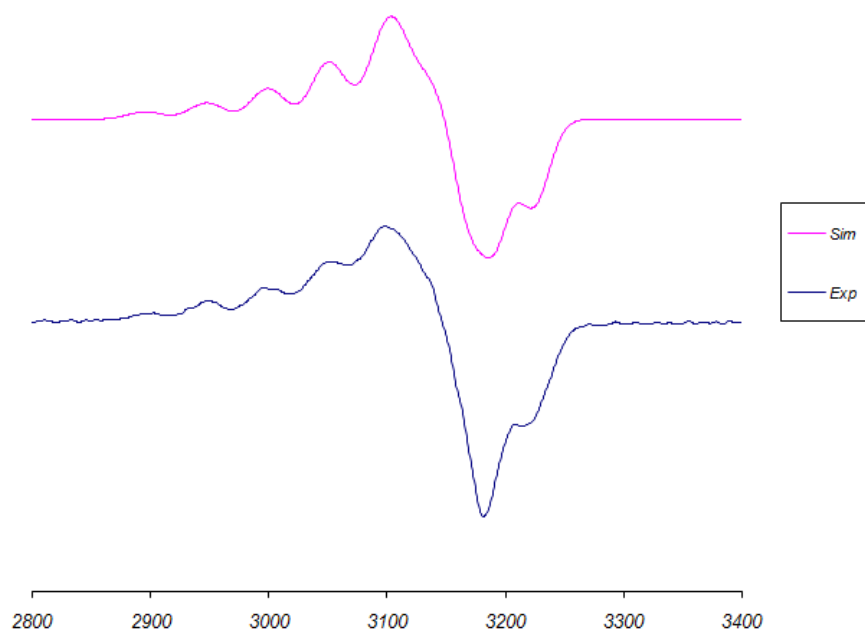



**Figure S18.** X-band EPR spectrum and simulation for  $[\{[\text{Cl}_2\text{IPr}]\text{Cu}\}_2(\mu\text{-S}(\text{CH}_2)_4\text{S})]^+$  ( $4^+$ ) (frozen dichloromethane glass, 8.905899 GHz, ModWidth = 0.1 mT, Power = 0.998 mW). Simulation was performed using a 2 Cu model:  $g_1 = 2.090$ ,  $g_2 = 2.009$ ,  $g_3 = 2.009$  with  $A_1(2 \text{ Cu}) = 162 \text{ MHz}$ ,  $A_2(2 \text{ Cu}) = A_3(2 \text{ Cu}) = 40 \text{ MHz}$ . Gaussian lineshape, line broadening  $W1 = 20 \text{ mT}$ ,  $W2 = 20 \text{ mT}$ ,  $W3 = 20 \text{ mT}$ .

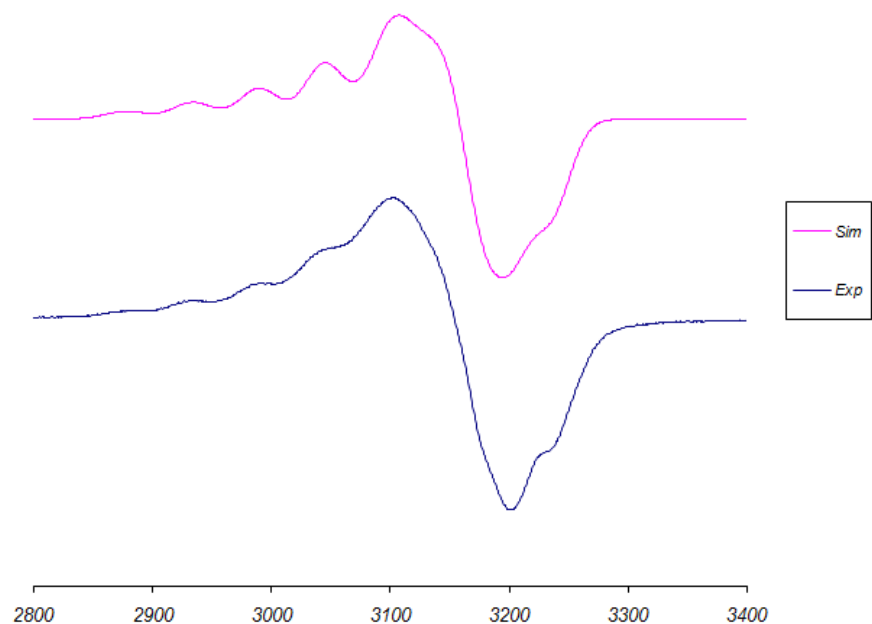

### X-ray structure refinement details

Single crystals of each compound **3**, **4** and **5** were mounted under mineral oil on glass fibers and immediately placed in a cold nitrogen stream at 100(2) K on a Bruker SMART CCD system. Either full spheres (triclinic) or hemispheres (monoclinic or higher) of data were collected ( $0.3^\circ$  or  $0.5^\circ$   $\omega$ -scans;  $2\theta_{\max} = 56^\circ$ ; monochromatic Mo K $\alpha$  radiation,  $\lambda = 0.7107$  Å) depending on the crystal system and integrated with the Bruker SAINT program. Structure solutions were performed using the SHELXTL/PC suite<sup>a</sup> and XSEED.<sup>b</sup> Intensities were corrected for Lorentz and polarization effects and an empirical absorption correction was applied using Blessing's method as incorporated into the program SADABS.<sup>c</sup> Non-hydrogen atoms were refined with anisotropic thermal parameters and hydrogen atoms were included in idealized positions. Structures for **3** and **4** were rendered with POV-Ray in XSEED using 50% probability ellipsoids; 35% probability ellipsoids were used for the structure of **5**.

In the structure of **3**, the C3 linker that connects the two [NHC]Cu fragments related by C2 symmetry was modeled at 50% occupancy due to this crystallographic symmetry element. Unique C28, C29, and C30 positions were identified and were treated by setting thermal parameters for C28 and C30 were set to be equal and related C-C distances within the symmetry-related C3 linker were constrained to be similar with the SADI command. Preliminary refinement of **4** showed the presence of a badly disordered fluorobenzene solvent molecule that was treated with the SQUEEZE subroutine of Platon<sup>d</sup> which revealed 367 solvent e<sup>-</sup> / cell corresponding to 0.92 molecules of fluorobenzene / dinuclear **4**. Furthermore, disorder in the C<sub>4</sub> linker was modeled with a 73 / 27 ratio of occupancies for C55A – C58A / C55B – C58B. Two distinct S2A and S2B (connected to C58A and C58B, respectively) positions were identified and modeled in the same 73 / 27 ratio of occupancies. Despite a few attempts at its collection, the structure of **5** suffers from non-optimal diffraction data quality so exact bond distances and angles from this structure should be viewed with caution. Nonetheless, distances about the linear [NHC]-Cu-S core are very similar to those of **4**.

### References for X-ray structure refinement details

(a) SHELXTL-PC, Vers. 5.10; 1998, Bruker-Analytical X-ray Services, Madison, WI; G. M. Sheldrick, SHELX-97, Universität Göttingen, Göttingen, Germany.

(b) L. Barbour, XSEED, 1999.

(c) SADABS; G. M. Sheldrick, 1996, based on the method described in R. H. Blessing, *Acta Crystallogr., Sect. A*, 1995, **51**, 33.

(d) Spek, A. L. *Acta Crystallogr.* **1990**, *A46*, C-34.

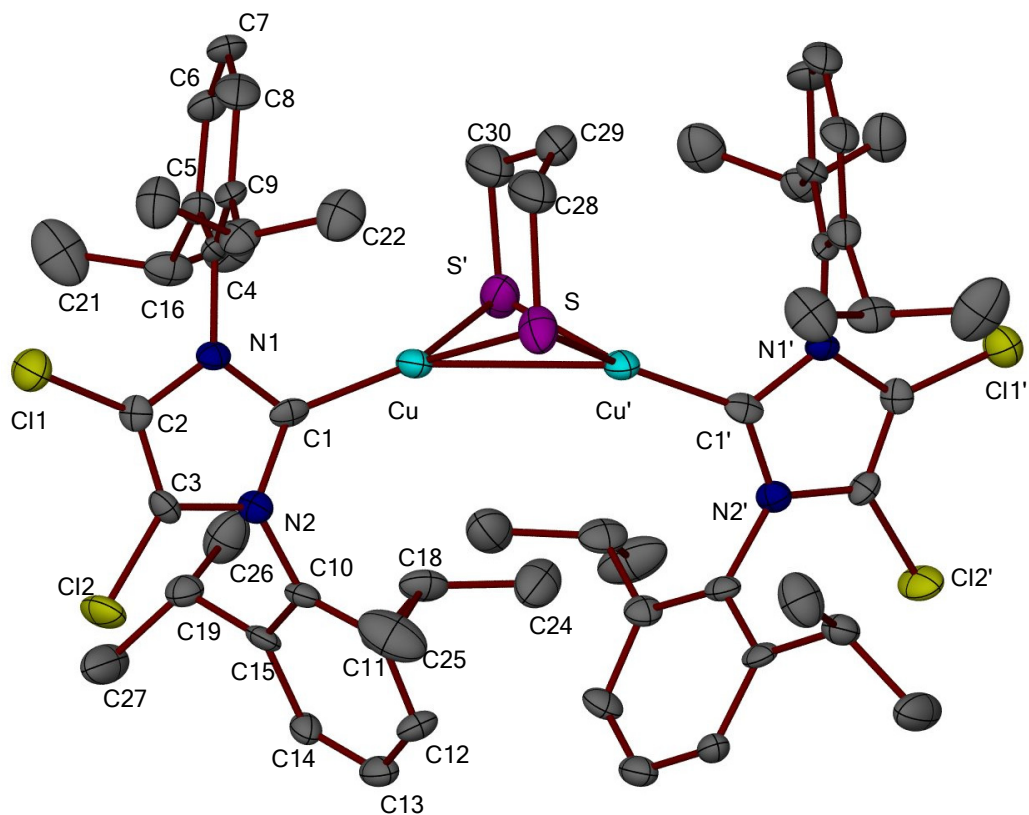

**Figure S19.** ORTEP diagram of  $\{[\text{Cl}_2\text{IPr}]\text{Cu}\}_2(\mu\text{-S}(\text{CH}_2)_3\text{S})$  (**3**) (all H atoms omitted; thermal ellipsoids represented at the 50% probability level). Selected bond distances (Å) and angles (deg): Cu-Cu' 2.8387(15), Cu-C1 1.887(6), Cu-S 2.2721(18), Cu-S' 2.362(2), C1-Cu-S 143.02(18), C1-Cu-S' 122.56(18), S-Cu-S' 93.76(7), Cu-S-Cu' 75.52(6).

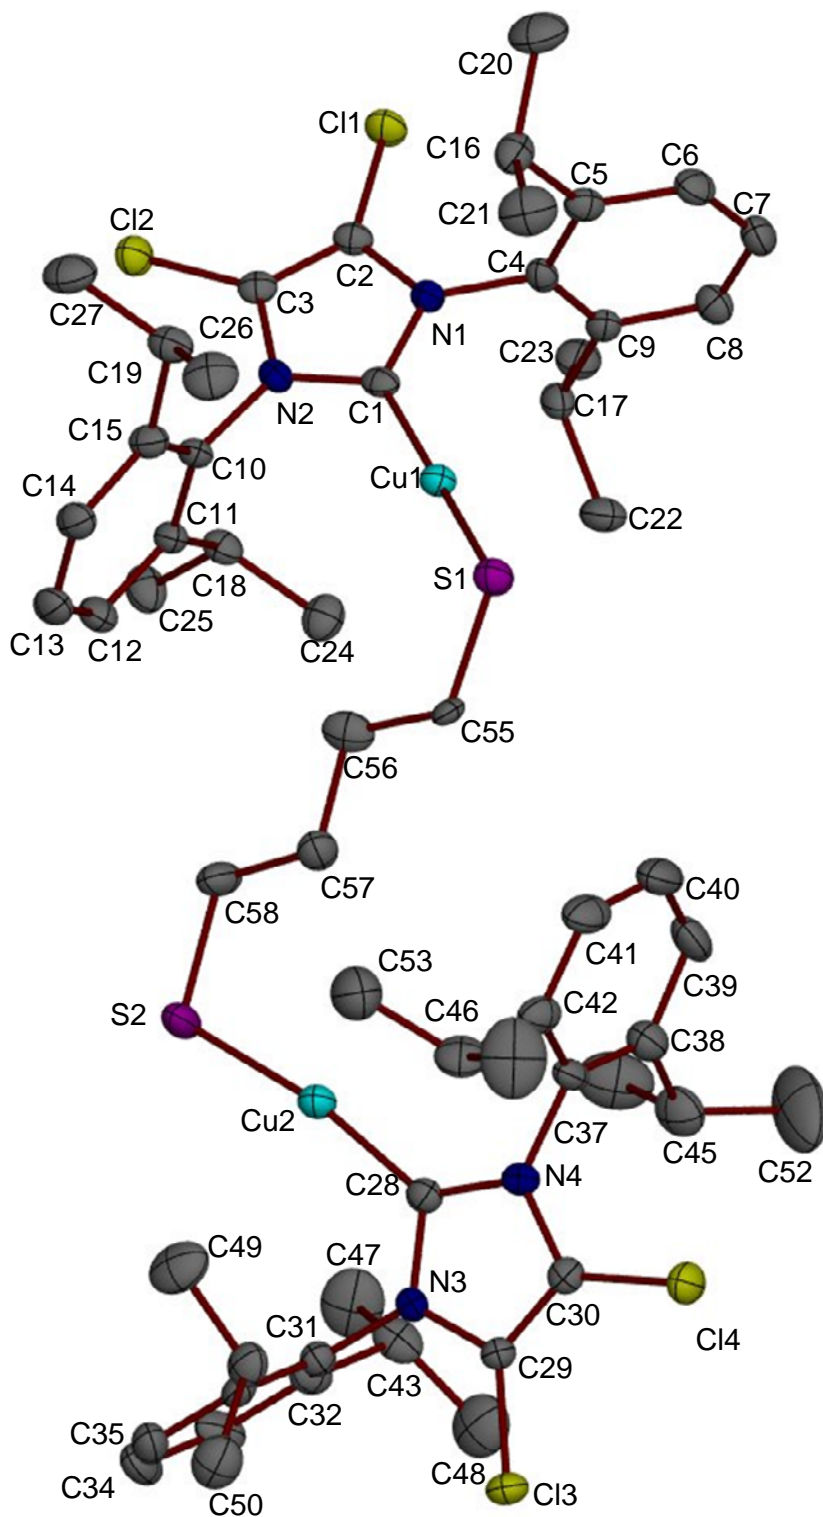

**Figure S20.** ORTEP diagram of  $\{[\text{Cl}_2\text{IPr}]\text{Cu}\}_2(\mu\text{-S}(\text{CH}_2)_4\text{S})$  (**4**) (all H atoms omitted; thermal ellipsoids represented at the 50% probability level). Selected bond distances (Å) and angles (deg): Cu1-C1 1.888(3), Cu1-S1 2.1293(10), Cu2-C28 1.894(3), Cu2-S2 2.148(3), C1-Cu1-S1 171.89(10), C28-Cu2-S2 170.06(12).

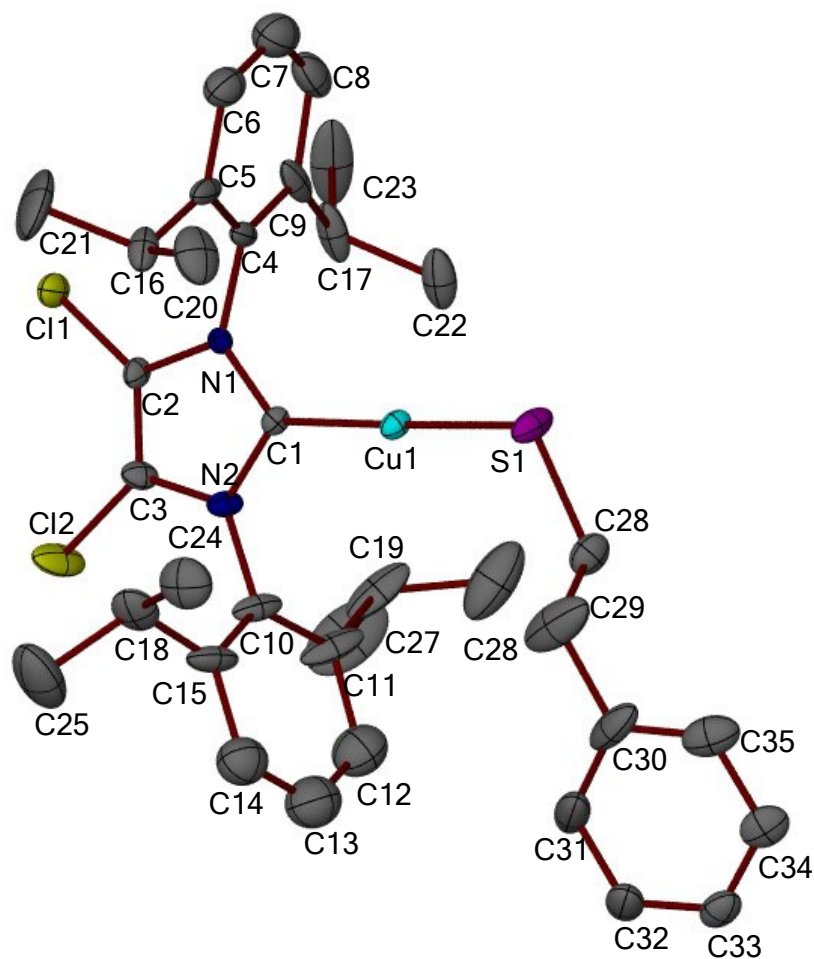

**Figure S21.** ORTEP diagram of  $[\text{Cl}_2\text{IPr}]\text{Cu-SCH}_2\text{CH}_2\text{Ph}$  (**5**) (all H atoms omitted; thermal ellipsoids represented at the 35% probability level). Selected bond distances (Å) and angles (deg): Cu1-C1 1.891(5), Cu1-S1 2.130(2), S1-C28 1.858(6), C1-Cu1-S1 178.56(15), C28-S1-Cu1 106.7(2).
